# Supplementary material for: Impact of Anthropogenic Landscape Transformation on Soil Fertility and Diversity of Carabid Beetles and Butterflies in Poland
Source: Research Square preprint supplement (doi:10.21203/rs.3.rs-5717352/v1), 2024-12-30
Supplement: Supplementary file 1 [file 31699a7979058d57ce7e85fc.docx]

**Supplementary Material**

Table S1. Results of the analysis of variance for soil element contents and the Wald test for number of Carabidae according to the two-factor linear model with interaction.

| *Source* | *Df* | *test statistic and p-value* | *HSI* | *F* | *SC* | *SC-org* | *Ca* | *K* | *Mg* | *N* | *C* | *Na* | *S* | *test statistic and p-value* | *Carabidae n_species* | *Carabidae n_individuals* |
| --- | --- | --- | --- | --- | --- | --- | --- | --- | --- | --- | --- | --- | --- | --- | --- | --- |
| location | 2 | F | 2.9 | 70.7 | 25.6 | 19.4 | 20.2 | 1.3 | 0.6 | 9.2 | 5.6 | 2.6 | 4.8 | Chi-Square | 3.1 | 79.7 |
|  |  | p | 0.078 | <0.001 | <0.001 | <0.001 | <0.001 | 0.294 | 0.558 | 0.002 | 0.013 | 0.107 | 0.021 | p | 0.213 | <0.001 |
| site | 2 | F | 16.5 | 61.7 | 1.9 | 19.7 | 94.2 | 31.0 | 10.0 | 6.1 | 5.7 | 2.8 | 0.9 | Chi-Square | 6.9 | 70.5 |
|  |  | p | <0.001 | <0.001 | 0.175 | <0.001 | <0.001 | <0.001 | 0.002 | 0.010 | 0.012 | 0.092 | 0.413 | p | 0.032 | <0.001 |
| location x site | 4 | F | 3.5 | 11.4 | 8.9 | 7.2 | 36.4 | 2.1 | 2.7 | 2.8 | 1.9 | 9.0 | 2.4 | Chi-Square | 5.4 | 149.6 |
|  |  | p | 0.027 | <0.001 | <0.001 | 0.001 | <0.001 | 0.127 | 0.072 | 0.059 | 0.155 | 0.001 | 0.087 | p | 0.251 | <0.001 |

*F – statistic value, p – p-value

Table S2. Correlation coefficients between first two Principal Components (PC1 and PC2) and soil variables.

| Variables | PC1 | PC2 |
| --- | --- | --- |
| pH | **0.77** | -0.28 |
| HSI | **0.91** | 0.06 |
| F | 0.48 | -0.54 |
| CO | 0.50 | **0.74** |
| CO_org | -0.23 | **0.84** |
| K | **0.96** | -0.20 |
| Mg | **0.87** | -0.30 |
| Ca | 0.59 | -0.45 |
| N | 0.62 | 0.66 |
| Na | 0.58 | 0.16 |
| C | 0.21 | **0.89** |
| S | 0.35 | **0.76** |
| Eigenvalues | 0.41 | 0.32 |
| Explained variation (cumulative)[%] | 41.26 | 72.76 |
